# **SPINAL MOBILIZATION CHARACTERISTICS: A SCOPING LITERATURE REVIEW OF BIOMECHANICAL PARAMETERS**

**Short title** Literature review of spinal mobilization biomechanical parameters

## **Authors**

Lindsay M Gorrell MChiroprac, PhD\*<sup>1</sup>

Luana Nyirö DCM<sup>1</sup>

Mégane Pasquier DC, PhD<sup>2,3</sup>

Isabelle Pagé DC, PhD<sup>4,5</sup>

Nicola R Heneghan PT, PhD<sup>6</sup>

Petra Schweinhardt MD, MChiroMed, PhD<sup>1</sup>

Martin Descarreaux DC, PhD<sup>3,7</sup>

## **Affiliations**

<sup>1</sup> Integrative Spinal Research Group, Department of Chiropractic Medicine, University Hospital Balgrist and University of Zürich, Switzerland

<sup>2</sup> Department of Anatomy, Université du Québec à Trois-Rivières, Trois-Rivières, QC, Canada.

<sup>3</sup> Institut Franco-Européen de Chiropraxie, Toulouse, France.

<sup>4</sup> Department of chiropractic, Université du Québec à Trois-Rivières, Trois-Rivières, QC, Canada

<sup>5</sup> Center for Interdisciplinary Research in Rehabilitation and Social Integration (Cirris), Centre Intégré Universitaire de Santé et de Services Sociaux de la Capitale-Nationale (CIUSSS-CN), Québec City, QC, Canada

<sup>6</sup> School of Sport, Exercise & Rehabilitation Sciences, University of Birmingham, Birmingham, United Kingdom

<sup>7</sup> Department of Human Kinetics, Université du Québec à Trois-Rivières, Trois-Rivières, QC, Canada.

\*Corresponding Author

Email: [lindsaymary.gorrell@uzh.ch](mailto:lindsaymary.gorrell@uzh.ch); phone: +41 44 510 73 82

## **ABSTRACT**

### **Background**

Spinal mobilization (SMob) is often included in the conservative management of spinal pain conditions

**NOTE: This preprint reports new research that has not been certified by peer review and should not be used to guide clinical practice.** as a recommended and effective treatment. While some studies quantify the biomechanical (kinetic)

36 parameters of SMob, interpretation of findings is difficult due to poor reporting of methodological  
37 details. The aim of this study was to synthesise the literature describing biomechanical parameters of  
38 manually applied SMob.

### 39 **Methods**

40 This study is reported in accordance with the Preferred Reporting Items for Scoping Reviews  
41 (PRISMA-ScR) statement. Databases were searched from inception to October 2022: MEDLINE  
42 (Ovid), Embase, CINAHL, ICL, PEDro and Cochrane Library. Data were extracted and reported  
43 descriptively for the following domains: general study characteristics, number of and characteristics of  
44 individuals who delivered/received SMob, region treated, equipment used and biomechanical  
45 parameters of SMob.

### 46 **Results**

47 Of 7,607 records identified, 36 (0.5%) were included in the analysis. Of these, SMob was delivered to  
48 the cervical spine in 13 (36.1%), the thoracic spine in 3 (8.3%) and the lumbopelvic spine in 18 (50.0%)  
49 studies. In 2 (5.6%) studies, spinal region was not specified. For SMob applied to all spinal regions,  
50 biomechanical parameters were: peak force (0-128N); duration (10-120s); frequency (0.1-4.5Hz); and  
51 force amplitude (1-102N).

### 52 **Conclusions**

53 This study reports considerable variability of the biomechanical parameters of SMob. In studies  
54 reporting biomechanical parameters, SMob was most frequently delivered to the lumbar and cervical  
55 spine of humans and most commonly peak force was reported. Future studies should focus on the  
56 detailed reporting of biomechanical parameters to facilitate the investigation of clinical dose-response  
57 effects.

## 58 **INTRODUCTION**

59 Musculoskeletal disorders, including low back and neck pain, affect most individuals during their lives  
60 (1–4). Such disorders are a prominent cause of disability globally (5) and can lead to decreased quality  
61 of life and psychological distress (6,7). The global prevalence of musculoskeletal disorders is increasing

62 (8), as are their associated financial and societal costs (9–11). Individuals commonly seek care from  
63 various healthcare providers for the treatment of musculoskeletal disorders (12–14) and the use of  
64 evidence-based interventions is recommended (12,15–17). Clinical practice guidelines recommend the  
65 use of conservative treatments including spinal mobilization (SMob) and/or spinal manipulation (SM)  
66 for the treatment of musculoskeletal disorders (18–21). SMob is characterized by the manual application  
67 of oscillatory forces with low velocity and variable amplitude and frequency to an articulation (22).  
68 SMob can be further described in terms of the movement amplitude (or 'grade') as first described by  
69 Maitland (23). Specifically: Grade I involves a small-amplitude movement performed at the beginning  
70 of the range of motion (ROM); Grade II is a large-amplitude movement performed within the free range  
71 but not moving into any resistance or stiffness; Grade III is a large-amplitude movement performed up  
72 to the limit of the range; and Grade IV involves a small-amplitude movement performed at the limit of  
73 the range. It has been reported that Grades I and II SMob are often applied with the intention of pain  
74 reduction, while Grades III and IV are commonly used to increase ROM (24).

75  
76 Transient neurophysiological effects in both the autonomic (e.g. changes in skin temperature and  
77 conductance (25,26)) and somatic (e.g. changes in muscle activity (26,27)) nervous systems have been  
78 reported in response to SMob. Additionally, beneficial clinical outcomes such as hypoalgesia (25,28–  
79 30) and increased ROM (27,31) have been linked to the intervention. However, it is yet to be established  
80 if physiological responses to manual therapy (i.e. SMob) are related to clinical outcomes (32).  
81 Therefore, the mechanisms underlying the beneficial clinical effects of SMob remain unclear (33,34)  
82 and without quantification of the intervention, it is difficult to determine which, if any, biomechanical  
83 parameters may influence patient outcomes (35).

84  
85 To date, there have been two reviews of SMob biomechanical parameters (22,36) reporting on mean  
86 peak forces during SMob delivered in a posterior-anterior (PA) direction. In a 1997 review by  
87 Björnsdóttir and colleagues, force application was discussed in a single paragraph, with data reported  
88 for SMob delivered to: i) the L3 vertebra by 2 instructors (mean peak force: 33.3N); and ii) an  
89 unspecified thoracic level by 2 manual therapists using Grades I (means of the means for the 2

90 therapists: 134.75N) and IV (342.5N) (36). In a 2006 review, Snodgrass and colleagues evaluated the  
91 literature for consistency of force application by manual therapists during PA SMob (22). This review  
92 reported on mean peak forces in the PA direction for Grades I-IV SMob delivered to the spine  
93 (cervical:4; thoracic:3; and lumbar:7) and artificial devices (4). Both reviews highlighted a variability  
94 in nomenclature, definitions of biomechanical parameters and force delivery during SMob (22,36).  
95 Since the Snodgrass and colleagues review, there has been no further collation or synthesis of SMob  
96 biomechanical parameters. Therefore, the aim of this study was to synthesise the existing literature  
97 describing biomechanical (kinetic) parameters during the delivery of manually applied SMob.

98

99

## **METHODOLOGY**

100 This scoping literature review is reported in accordance with the Preferred Reporting Items for Scoping  
101 Reviews (PRISMA-ScR) statement (37). The protocol was developed by an experienced, international  
102 and interprofessional team and was prospectively registered at the Open Science Framework Registry  
103 (<https://osf.io/3mqjs/>). The original study design and subsequent search were conducted with the  
104 intention to capture information concerning the biomechanical parameters of both SMob and SM.  
105 Protocol deviations included that: i) due to the large quantity of data published on the topic, it was  
106 decided to report the biomechanical parameters of SMob and SM separately; and ii) studies reporting  
107 on SMob delivered to animals were excluded as it was unknown how biomechanically comparable  
108 SMob delivery would be to that delivered to humans. Due to the separate reporting of SMob and SM  
109 data in different manuscripts, several sections of the methods described here mirror those in the  
110 manuscript reporting on SM data (under peer-review).

111

### **Eligibility criteria**

113 Eligibility criteria were developed using the Sample, Phenomenon of Interest, Design, Evaluation,  
114 Research Type (SPIDER) search concept tool (38).

115

### **Inclusion criteria**

117 S – the sample population was humans (of any age) and non-humans (e.g. instrumented tool, manikin);  
118 PI – the phenomenon of interest was manually delivered SMob and/or SM, delivered by any regulated  
119 health professional (e.g. physiotherapist or chiropractor) or student enrolled at an accredited institution;  
120 D – observational study designs (e.g. case series studies, cohort and case-control studies);  
121 E – kinetic variables of the intervention (e.g. force-time profile); and  
122 R – original quantitative research data from studies utilizing SMob and/or SM as either the sole  
123 intervention or as a comparator.

124

### 125 **Exclusion criteria**

126 Exclusion criteria were: i) SMob and/or SM delivered by a mechanical instrument or device; ii) all other  
127 therapeutic modalities; iii) manuscript not published in English, French or German; and iv) studies that  
128 had been retracted, were secondary analyses, trial registrations, protocols, clinical practice guidelines,  
129 commentaries, editorials, conference proceedings or single case studies.

130

### 131 **Search strategy**

132 The search strategy was created by subject specific and methodological experts, with the assistance of  
133 an experienced medical and health sciences librarian. MEDLINE(Ovid), Embase, CINAHL, ICL,  
134 PEDro and Cochrane Library databases were searched from inception to 4 October 2022. The first  
135 author (LG) screened the reference lists of included studies to ensure that all relevant literature was  
136 captured. The following search terms and derivatives were adapted for each search engine: (spine,  
137 spinal, manipulation, mobilization or mobilisation, musculoskeletal, chiropractic, osteopathy,  
138 physiotherapy, naprapathy, force, motor skill, biomechanics, dosage, dose-response, education,  
139 performance, psychomotor, back, neck, spine, thoracic, lumbar, pelvic, cervical, sacral). Search  
140 strategies for all databases are provided in S1 Appendix.

141

### 142 **Study selection process**

143 Records retrieved from the electronic searches were exported to the Rayyan© online platform (2022)  
144 (39) and duplicates were removed. Beginning with title and abstract review, groups of two authors (LG

145 and LN; LG and IP; LG and MP) independently screened studies in a step-wise process. Full-texts of  
146 the remaining studies were then retrieved and screened independently by groups of two authors (LG  
147 and LN; LG and IP). Disagreements regarding study inclusion that could not be resolved by consensus  
148 were resolved by a third author (MD).

149

## 150 **Data extraction**

151 Data were extracted from eligible studies by groups of two independent authors (LG and LN; LG and  
152 MP). These data included: i) general study characteristics (e.g. title, author, year and country of  
153 publication and type of study); ii) general study information (e.g. individual who delivered the  
154 intervention [e.g. clinician, student], professional qualification of individual delivering the intervention  
155 [e.g. physiotherapist, chiropractor], years of clinician experience/number of student hours, number of  
156 clinicians/students who delivered SMob or SM, recipient [e.g. human, manikin], number of recipients,  
157 whether the intervention was SMob [and grade of mobilization] or SM, the region treated [e.g. cervical,  
158 thoracic] and the measurement equipment used to record biomechanical parameters of the intervention);  
159 and iii) biomechanical parameters of SMob (e.g. peak force, SMob duration and frequency and force  
160 amplitude). Data reporting on SM is submitted for publication elsewhere (manuscript under peer-  
161 review).

162

## 163 **Definitions**

164 In this study, the following definitions were used:

- 165 • Peak force: the maximum applied force during a single SMob, reported as the mean of the force  
166 peaks that occurred during a specified period of the intervention.
- 167 • Duration: the time period of SMob delivery.
- 168 • Frequency: the rate of force oscillation during repeated applications.
- 169 • Force amplitude: the difference between the minimum and maximum forces applied during the  
170 intervention (i.e. the difference between a peak force and trough), reported as the mean of the  
171 force amplitudes that occurred during a specified period of SMob.

- 172 • Metrological details: descriptions of the suitability (e.g. accuracy, precision, sensitivity) of the  
173 measurement equipment to quantify the biomechanical parameters of SMob (40).

174

### 175 **Data synthesis**

176 Descriptive statistics (mean, standard deviation and range) were used to report data. Any deviations  
177 from this (such as the use of 95% confidence intervals or the reporting of median and interquartile  
178 range) are explicitly indicated and reflect how the data were reported in the original studies. Microsoft  
179 Excel (Office 365, Microsoft Corporation, Redmond, USA) was used to calculate frequencies and  
180 proportions of trials reporting on each of the specified domains mentioned above.

181

182 In order to manage the substantial volume of data presented in this study, the following decisions were  
183 made regarding how to best report the data: i) for studies reporting forces measured in 3-dimensions  
184 (3D) and including the resultant forces (i.e. the total forces applied), only the resultant forces are  
185 reported; ii) for studies measuring forces applied in 3D but not including the resultant forces, only the  
186 forces measured in the primary direction of the applied force are reported in the tables (e.g. for prone  
187 PA thoracic SMob, the vertical forces are reported). Regarding the reporting of metrological data, a  
188 consensus was reached by two authors (LG and MD) as to whether adequate information was provided.  
189 In cases where metrological details were discussed (e.g. it was stated that measurement equipment  
190 accuracy was good) but it was not clear if this statement was based on data (or what data), this was  
191 recorded as metrological details were not provided. No assessment of study quality was performed.

192

## 193 **RESULTS**

194 The electronic searches returned 7,607 records, with 3,981 unique records remaining after de-  
195 duplication (n=3,626) (Figure 1). Following title/abstract screening, 247 full-texts were screened. Of  
196 these, 146 reports were excluded (e.g. did not report biomechanical parameters: 56), leaving 101  
197 included studies. Of these, 36 reported on SMob and were included in the analysis. A list of these studies  
198 is provided in S2 Appendix and the reference number cited in the tables refers to this list.

199 Figure 1: PRISMA flow-chart.

200

201 Of the 36 included studies, most were published in the 10-year period from 2003 to 2012 (n=13, 36.1%)  
 202 in Australia (n=13, 36.1%) (Table 1). Typically, the study design was cross-sectional (n=26, 72.2%),  
 203 with SMob delivered by a clinician only (i.e. no students were involved) (n=24, 66.7%) whose  
 204 profession was a physiotherapist (n=27, 75.0%). In the 31 (86.1%) studies in which SMob was delivered  
 205 by clinicians, clinical experience was unclear in 14 (45.2%) studies and when it was reported, clinicians  
 206 with more than 5 years' experience most commonly delivered SMob (n=10, 32.3%). When SMob was  
 207 delivered by a student (n=12, 33.3%), the number of SMob training hours was not reported in any  
 208 (n=12, 100.0%) study. Most frequently, the number of individuals (i.e. clinicians and/or students)  
 209 delivering SMob was between 1 and 49 (n=29, 80.6%), with 12 (33.3%) of these studies involving only  
 210 1 to 2 individuals delivering SMob. SMob was delivered to adults (18 to 65 years) in 20 (55.6%) studies,  
 211 with the demographics of the cohort to which SMob was delivered not reported in 8 (22.2%) studies.  
 212 The number of individuals receiving SMob was reported as between 1 and 49 in 28 (77.8%) studies,  
 213 with only 1 to 2 individuals receiving SMob in 10 (27.8%) studies. SMob was most commonly delivered  
 214 to the lumbopelvic spine (n=18, 50.0%) and the cervical spine (n=13, 36.1%), and the SMob 'technique'  
 215 was reported in all but one study (n=35, 97.2%). Biomechanical parameters were measured at the  
 216 patient-table interface in 16 (44.4%) studies, another interface (e.g. thumbnail of the clinician) in 6  
 217 (16.7%) studies, the clinician-patient interface in 5 (13.9) studies and the clinician-ground interface in  
 218 4 (11.1%) studies. Metrological data of the measurement equipment were reported in 27 (75.0%)  
 219 studies. Regarding biomechanical parameters, the following were reported: peak force in 35 (97.2%);  
 220 SMob duration in 12 (33.3%); SMob frequency in 16 (44.4%); and amplitude of force in 11 (30.6%)  
 221 studies.

222

223 Table 1: Overall summary of studies reporting on the biomechanical parameters of spinal mobilization  
 224 (SMob) (n=36).  
 225

| Year, n=36   | n, (%)    | Individual who received SMob, n=36 | n, (%)    |
|--------------|-----------|------------------------------------|-----------|
| 2013 to 2022 | 12 (33.3) | Adult (18-65yr)                    | 20 (55.6) |
| 2003 to 2012 | 13 (36.1) | Geriatric (>65yr)                  | 1 (2.8)   |
| 1993 to 2002 | 10 (27.8) | Instrumented tool/force plate      | 4 (11.1)  |



|                                             |            |                                            |           |
|---------------------------------------------|------------|--------------------------------------------|-----------|
| Before 1993                                 | 1 (2.8)    | Manikin                                    | 1 (2.8)   |
| Country, n=36                               |            | Mixed                                      | 2 (5.6)   |
| Australia                                   | 13 (36.1)  | Unclear                                    | 8 (22.2)  |
| Canada                                      | 6 (16.7)   | Number of individuals receiving SMob, n=36 |           |
| England                                     | 6 (16.7)   | 1 or 2                                     | 10 (27.8) |
| Ireland                                     | 1 (2.8)    | 0 to 49                                    | 28 (77.8) |
| Malaysia                                    | 1 (2.8)    | 50 to 99                                   | 5 (13.9)  |
| South Africa                                | 1 (2.8)    | Not reported                               | 3 (8.3)   |
| Unclear                                     | 1 (2.8)    | Region SMob delivered to, n=36             |           |
| USA                                         | 7 (19.4)   | Cervical                                   | 13 (36.1) |
| Study type, n=36                            |            | Thoracic                                   | 3 (8.3)   |
| Cross-sectional                             | 26 (72.2)  | Lumbopelvic                                | 18 (50.0) |
| Prospective                                 | 10 (27.8)  | Other                                      | 2 (5.6)   |
| Individual who delivered SMob, n=36         |            | Technique reported, n=36                   |           |
| Practitioner                                | 24 (66.7)  | Yes                                        | 35 (97.2) |
| Student                                     | 5 (13.9)   | No                                         | 1 (2.8)   |
| Both                                        | 5 (13.9)   | Measurement interface, n=36                |           |
| Unclear                                     | 2 (5.6)    | Patient-table                              | 16 (44.4) |
| Profession, n=36                            |            | Clinician-patient                          | 5 (13.9)  |
| Physiotherapist                             | 27 (75.0)  | Clinician-ground                           | 4 (11.1)  |
| Chiropractor                                | 5 (13.9)   | Table-ground                               | 3 (8.3)   |
| Unclear                                     | 4 (11.1)   | Both clinician-patient & patient-table     | 1 (2.8)   |
| Experience (clinician) n=31                 |            | Other                                      | 6 (16.7)  |
| >5yr                                        | 10 (32.3)  | Unclear                                    | 3 (8.3)   |
| Mixed                                       | 7 (22.6)   | Metrological data reported, n=36           |           |
| Unclear                                     | 14 (45.2)  | Reported                                   | 27 (75.0) |
| Hours of training (student) n=12            |            | Not reported                               | 9 (25.0)  |
| Reported                                    | 0 (0.0)    | Peak force, n=36                           |           |
| Not reported                                | 12 (100.0) | Reported                                   | 35 (97.2) |
| Number of individuals delivering SMob, n=36 |            | Not reported                               | 1 (2.8)   |
| 1 or 2                                      | 12 (33.3)  | Duration of mobilization, n=36             |           |
| 1 to 49                                     | 29 (80.6)  | Reported                                   | 12 (33.3) |
| 50 to 99                                    | 2 (5.6)    | Not reported                               | 24 (66.7) |
| 100 to 149                                  | 2 (5.6)    | Frequency of mobilization, n=36            |           |
| >150                                        | 1 (2.8)    | Reported                                   | 16 (44.4) |
| Not reported                                | 2 (5.6)    | Not reported                               | 20 (55.6) |
|                                             |            | Amplitude of force, n=36                   |           |
|                                             |            | Reported                                   | 11 (30.6) |
|                                             |            | Not reported                               | 25 (69.4) |

226 Abbreviations: n: number of studies, SMob: spinal mobilization, y: year, >: greater than, <: less than.

227

## 228 **Cervical spine**

229 Of the 11 (84.6%) studies that reported on SMob delivered to the cervical spine of humans, the

230 following biomechanical parameters were reported: i) peak force: 0-128N; ii) duration: 60s; iii)

231 frequency: 0.28-2.4Hz; and iv) force amplitude: 14.4-52.5N (Tables 2 & 3; S3 Appendix, Table A). Of

232 the 2 (15.4%) studies that reported on SMob delivered to non-humans (i.e. human analogue manikin:1;

233 instrumented tool:1) peak force 42-181N was reported.

234

235 **Thoracic spine**

236 Of the 2 (66.7%) studies that reported on SMob delivered to the thoracic spine of humans, the following  
237 biomechanical parameters were reported: i) peak force: 297-323N; ii) duration: 3x60s; and iii)  
238 frequency: 0.47-0.53Hz (Tables 3 & 4; S3 Appendix, Table B). In the one (33.3%) study that reported  
239 on SMob delivered to 12 T5-8 sections of human cadavers: i) peak force: 106-223N; and ii) frequency:  
240 0.5Hz were reported.

241

242 **Lumbopelvic spine**

243 Of the 17 (94.4%) studies that reported on SMob delivered to the lumbar spine of humans, the following  
244 biomechanical parameters were reported: i) peak force: 3-430N; ii) duration: 10-120s; iii) frequency:  
245 0-5Hz; and iv) force amplitude: 1-102N (Tables 3 & 5; S3 Appendix, Table C). In the one (33.3%)  
246 study that reported on SMob delivered to an instrumented tool: i) peak force: 36-119N; and ii) duration:  
247 30s were reported.

248

249 **No region specified**

250 Of the 2 (5.6%) studies that reported on SMob delivered to an unspecified region, the following  
251 biomechanical parameters were reported: i) peak force: 2-361N; ii) duration: 20s; and iii) frequency:  
252 28-32 cycles/min (Tables 3 & 6; S3 Appendix, Table D).

253 Table 2: Summary of studies reporting on the biomechanical parameters of spinal mobilization (SMob) delivered to the cervical spine of humans (n=11) and  
 254 non-humans (i.e. human analogue manikins, instrumented tools) (n=2).

| Author/s<br>Year, Country                           | SMob delivery<br>Profession (n) | Experience                                  | Recipient/s (n)          | Location/s | Technique/s<br>Grade/s | Interface/s       | Equipment              | Metrological<br>data |
|-----------------------------------------------------|---------------------------------|---------------------------------------------|--------------------------|------------|------------------------|-------------------|------------------------|----------------------|
| <b>Humans</b>                                       |                                 |                                             |                          |            |                        |                   |                        |                      |
| Conradie et al<br>2004, South Africa <sup>7</sup>   | Clin<br>Physio (16)             | NR                                          | Adult (1)                | C6         | PA<br>I                | Clin-pat          | Pressure sensor        | No                   |
| Snodgrass et al<br>2006, Australia <sup>28</sup>    | Clin<br>Physio (10)             | Mixed                                       | Adult (1)                | C2/C7      | PA<br>I-IV             | Pat-table         | Load cells             | No                   |
| Snodgrass et al<br>2009, Australia <sup>29</sup>    | Clin<br>Physio (116)            | >5y                                         | Adult (35)               | C2/C7      | PA<br>I-IV             | Pat-table         | Load cells             | Yes                  |
| Snodgrass et al<br>2010, Australia <sup>30,31</sup> | Clin & Stud<br>Physio (336)     | Clin: NR<br>Stud: NR (no<br>clin exper)     | Adult (67)               | C2/C7      | PA<br>I-IV             | Pat-table         | Load cells             | Yes                  |
| Snodgrass et al<br>2010, Australia <sup>31</sup>    | Stud<br>Physio (120)            | NR (2-4 y)                                  | Adult (32)               | C2/C7      | PA<br>I-IV             | Pat-table         | Load cells             | Yes                  |
| Gudavalli et al<br>2013, USA <sup>13</sup>          | Clin<br>Chiro (4)               | NR                                          | Adult (9)                | C5/C6      | C distract<br>NA       | Pat-table         | Force plate            | No                   |
| Snodgrass et al<br>2014, Australia <sup>33</sup>    | Clin<br>Physio (1)              | >5y                                         | Adult (64)               | MP (C3-7)  | PA<br>III              | Pat-table         | Load cells             | No                   |
| Gudavalli et al<br>2015, USA <sup>15</sup>          | Clin<br>Chiro (NR)              | NR                                          | Adult (45)               | Occi/C5    | C distract<br>NA       | Pat-table         | Force plate            | No                   |
| Gudavalli et al<br>2015, USA <sup>16</sup>          | Clin<br>Chiro (2)               | >5y                                         | Adult (48)               | Occi/C5    | C distract<br>NA       | Pat-table         | Force plate            | No                   |
| Kope et al<br>2018, Canada <sup>19</sup>            | Clin<br>Physio (5)              | >5y                                         | NR (NR)                  | C5/C6      | PA<br>III              | Clin thumbnail    | Strain gauge           | No                   |
| Chia et al<br>2021, Malaysia <sup>4</sup>           | Clin<br>Physio (1)              | NR                                          | NR (30)                  | C6         | PA<br>I-IV             | NR                | Pressure sensor        | No                   |
| <b>Non-humans</b>                                   |                                 |                                             |                          |            |                        |                   |                        |                      |
| Buckingham et al<br>2007, Australia <sup>3</sup>    | Clin & Stud<br>Physio (36)      | Clin: Mixed<br>Stud: NR (4 <sup>th</sup> y) | Manikin (1)              | C6         | PA<br>NR               | In manikin        | Strain gauge           | No                   |
| Walsh et al<br>2011, Ireland <sup>35</sup>          | Stud<br>Physio (40)             | NR (final y)                                | Instrumented<br>tool (1) | C7         | PA<br>III              | Instrumented tool | Pinch-grip<br>analyser | No                   |

255 Abbreviations: C: cervical, Chiro: chiropractor, Clin: clinician, distract: distraction, exper: experience, Mixed: experience of clinicians both > and < 5 years, MP: most painful,  
 256 (n): number of participants, NA: not applicable, NR: not reported, Occi: occiput, PA: posterior-anterior, Pat: patient, Physio: physiotherapist, SMob: spinal mobilization, Stud:  
 257 students, y: years, >: greater than.

258  
 259  
 260

261 Table 3: Summary of biomechanical parameters reported by region for studies reporting on spinal mobilization (SMob) (n=36).

|                     | Location of measurement<br>n (%)                                                                                                  | Metrologic data<br>reported<br>n (%) | Peak force reported n<br>(%)<br>[range (N)] | Duration reported<br>n (%)<br>[range (s)] | Frequency reported n<br>(%)<br>[range (Hz)] | Force amplitude<br>reported n (%)<br>[range (N)] |
|---------------------|-----------------------------------------------------------------------------------------------------------------------------------|--------------------------------------|---------------------------------------------|-------------------------------------------|---------------------------------------------|--------------------------------------------------|
| Humans<br>(n=11)    | Patient-table: 8 (72.7)<br>Clinician-patient: 1 (9.1)<br>NR: 1 (9.1)<br>Other: 1 (9.1)                                            | 3 (27.3)                             | 11 (100.0)<br>[0-128]                       | 1 (9.1)<br>60                             | 6 (54.5)<br>[0.3-2.4]                       | 4 (36.4)<br>[14.4-52.5]                          |
| Non-humans<br>(n=2) | Within device: 1 (50.0)<br>Clinician-device: 1 (50.0)                                                                             | 0 (0.0)                              | 2 (100.0)<br>[42-181]                       | 0 (0.0)<br>[NA]                           | 0 (0.0)<br>[NA]                             | 0 (0.0)<br>[NA]                                  |
| Humans<br>(n=2)     | Clinician-patient: 1 (50.0)<br>Clinician-patient &<br>patient-table: 1 (50.0)                                                     | 1 (50.0)                             | 1 (50.0)<br>[297-323]                       | 1 (50.0)<br>3x60                          | 1 (50.0)<br>[28-32 <sup>A</sup> ]           | 0 (0.0)<br>[NA]                                  |
| Non-humans<br>(n=1) | Clinician-device<br>& table-ground: 1 (100.0)                                                                                     | 0 (0.0)                              | 1 (100.0)<br>[106-223]                      | 0 (0.0)<br>[NA]                           | 1 (100.0)<br>0.5                            | 0 (0.0)<br>[NA]                                  |
| Humans<br>(n=17)    | Patient-table: 7 (41.2)<br>Clinician- ground: 4<br>(23.5)<br>Table-ground: 3 (17.6)<br>Clinician-patient: 2 (11.8)<br>NR: 1 (5.9) | 3 (17.6)                             | 16 (94.1)<br>[3-430]                        | 8 (47.1)<br>[10-120]                      | 7 (41.2)<br>[0.1-4.5]                       | 7 (41.2)<br>[1-102]                              |
| Non-humans<br>(n=1) | Device-table: 1 (100.0)                                                                                                           | 0 (0.0)                              | 1 (100.0)<br>[36-119]                       | 1 (100.0)<br>30                           | 0 (0.0)<br>[NA]                             | 0 (0.0)<br>[NA]                                  |
| Non-humans<br>(n=2) | Within device: 1 (50.0)<br>Clinician-device &<br>Clinician-ground: 1<br>(50.0)                                                    | 0 (0.0)                              | 2 (100.0)<br>[2-361]                        | 1 (50.0)<br>20                            | 1 (50.0)<br>[28-32 <sup>A</sup> ]           | NR                                               |

262 Abbreviations: Hz: Hertz, N: Newtons, n: number of studies, NA: not applicable, NR: not reported, Other: clinician thumb nailbed, s: seconds, SMob: spinal mobilization, Δ:  
263 data are reported as cycles/minute.

264

265 Table 4: Summary of studies reporting on the biomechanical parameters of spinal mobilization (SMob) delivered to the thoracic spine of humans (n=2) and  
266 non-humans (i.e. partial cadaveric sections) (n=1).

| Author/s<br>Year, Country                      | SMob delivery<br>Profession (n) | Experience | Recipient/s (n) | Location/s | Technique/s<br>Grade/s                           | Interface/s | Equipment       | Metrological<br>data |
|------------------------------------------------|---------------------------------|------------|-----------------|------------|--------------------------------------------------|-------------|-----------------|----------------------|
| <b>Humans</b>                                  |                                 |            |                 |            |                                                  |             |                 |                      |
| Zegarra-Parodi et al<br>2016, NR <sup>36</sup> | NR<br>NR (1)                    | NR         | Adult (32)      | T1         | Lateral glide via lamina<br>NR (5/40/80% of PPT) | Clin-pat    | Pressure sensor | No                   |

|                                               |                    |     |                                    |       |                  |                         |                           |     |
|-----------------------------------------------|--------------------|-----|------------------------------------|-------|------------------|-------------------------|---------------------------|-----|
| Funabashi et al<br>2021, Canada <sup>10</sup> | Clin<br>Chiro (1)  | >5y | Geriatric (18)                     | T1-12 | Clin choice<br>4 | Clin-pat<br>Pat-table   | Load cells<br>Force plate | Yes |
| <b>Non-humans</b>                             |                    |     |                                    |       |                  |                         |                           |     |
| Sran et al<br>2004, Canada <sup>34</sup>      | Clin<br>Physio (2) | NR  | Cadaveric<br>sections T5-8<br>(12) | T6    | PA<br>NR         | Clin-pat<br>Table-floor | Pressure sensor           | No  |

267 Abbreviations: Chiro: chiropractor, Clin: clinician, (n): number of participants, NR: not reported, PA: posterior-anterior, Pat: patient, Physio: physiotherapist, PPT: pressure  
268 pain threshold, SMob: spinal mobilization, T: thoracic, y: years, >: greater than.  
269

270 Table 5: Summary of studies reporting on the biomechanical parameters of spinal mobilization (SMob) delivered to the lumbopelvic spine of humans (n=17)  
271 and non-humans (i.e. instrumented tools) (n=1).

| Author/s<br>Year, Country                          | SMob delivery<br>Profession (n) | Experience             | Recipient/s (n) | Location/s | Technique/s<br>Grade/s | Interface/s  | Equipment        | Metrological<br>data |
|----------------------------------------------------|---------------------------------|------------------------|-----------------|------------|------------------------|--------------|------------------|----------------------|
| <b>Humans</b>                                      |                                 |                        |                 |            |                        |              |                  |                      |
| Lee et al<br>1990, Australia <sup>21</sup>         | Stud<br>Physio (53)             | NR (3 <sup>rd</sup> y) | NR (1)          | L3         | PA<br>II               | Table-ground | Force plate      | No                   |
| Petty<br>1995, England <sup>23</sup>               | Clin<br>Physio (1)              | NR                     | Adult (18)      | L3         | PA<br>IV               | Clin-ground  | Force plate      | No                   |
| Harms & Bader<br>1997, England <sup>17</sup>       | Clin<br>Therapist (30)          | NR                     | Adult (1)       | L3         | PA<br>I-IV/endfeel     | Pat-table    | Load cells       | No                   |
| Harms et al<br>1999, England <sup>18</sup>         | Clin<br>Therapist (1)           | <5y                    | Adult (61)      | L3         | PA<br>I-IV             | Pat-table    | Load cells       | No                   |
| Goodsell et al<br>2000, Australia <sup>12</sup>    | Clin<br>Physio (1)              | NR                     | Mixed ages (26) | MP         | PA<br>NR               | Pat-table    | Load cells       | No                   |
| Allison et al<br>2001, Australia <sup>1</sup>      | Clin<br>Physio (1)              | NR                     | Adult (24)      | L3         | PA<br>NR               | NR           | Force transducer | No                   |
| Chiradejnant et al<br>2001, Australia <sup>5</sup> | Clin<br>Physio (3)              | NR                     | NR (3)          | L3         | PA<br>II/IV            | Pat-table    | Load cells       | No                   |
| Chiradejnant et al<br>2002, Australia <sup>6</sup> | Clin<br>Physio (10)             | NR                     | Mixed ages (80) | L1-5       | PA<br>I-IV             | Pat-table    | Load cells       | Yes                  |
| Cook et al<br>2002, USA <sup>8</sup>               | Clin<br>Physio (23)             | Mixed                  | Adult (2)       | L3         | PA<br>I-IV             | Clin-ground  | Force plate      | No                   |
| Cook<br>2003, USA <sup>9</sup>                     | Clin<br>Physio (22)             | Mixed                  | NR (2)          | L3         | PA<br>I-IV             | Clin-ground  | Force plate      | No                   |
| Krekoukias et al<br>2009, England <sup>20</sup>    | NR<br>Therapist (1)             | NR                     | Adult (36)      | L3         | PA<br>NR               | Clin-ground  | Force plate      | No                   |
| Sheaves et al<br>2011, Australia <sup>25</sup>     | Stud<br>Physio (62)             | NR (3 <sup>rd</sup> y) | NR (62)         | L3         | PA<br>II               | Pat-table    | NR               | Yes                  |
| Snodgrass &<br>Odelli                              | Clin & Stud<br>Physio (27)      | Clin: >5y<br>Stud: NR  | NR (26)         | L3         | PA<br>I-IV             | Pat-table    | Load cells       | Yes                  |

|                                                      |                            |                                           |                          |       |              |              |                  |    |
|------------------------------------------------------|----------------------------|-------------------------------------------|--------------------------|-------|--------------|--------------|------------------|----|
| 2012, Australia <sup>32</sup>                        |                            |                                           |                          |       |              |              |                  |    |
| Shum et al<br>2013, England <sup>26</sup>            | Clin<br>Physio (1)         | >5y                                       | Adult (39)               | L4    | PA<br>III    | Table-ground | Force plate      | No |
| Gudavalli & Cox<br>2014, USA <sup>14</sup>           | Clin<br>Chiro (10)         | Mixed                                     | Adult (4)                | NR    | Cox FD<br>NA | Clin-pat     | Force transducer | No |
| Gagnon et al<br>2016, Canada <sup>11</sup>           | Clin & Stud<br>Physio (8)  | Clin: >5y<br>Stud: NR (4 <sup>th</sup> y) | Adult (5)                | L2/L4 | PA<br>I-IV   | Table-ground | Force plate      | No |
| Petersen et al<br>2020, USA <sup>22</sup>            | Stud<br>Physio (24)        | NR (1 <sup>st</sup> y)                    | Adult (24)               | L3    | PA<br>III/IV | Clin-pat     | Pressure sensor  | No |
| <b>Non-humans</b>                                    |                            |                                           |                          |       |              |              |                  |    |
| Björnsdóttir &<br>Kumar<br>2003, Canada <sup>2</sup> | Clin & Stud<br>Physio (20) | Clin: >5y<br>Stud: NR (< 1y<br>grad)      | Instrumented tool<br>(1) | NR    | PA<br>II     | Pat-table    | Load cell        | No |

272 Abbreviations: Chiro: chiropractor, Clin: clinician, FD: flexion-distraction, Grad: graduation, L: lumbar, Mixed: experience of clinicians both > and < 5 years, MP: most painful  
273 level, (n): number of participants, NR: not reported, PA: posterior-anterior, Pat: patient, Physio: physiotherapist, Stud: students, SMob: spinal mobilization, y: years, >: greater  
274 than, <: less than.

275  
276 Table 6: Summary of studies reporting on the biomechanical parameters of spinal mobilization (SMob) delivered to non-humans (i.e. instrumented tools) with  
277 no region specified (n=2).

| Author/s<br>Year, Country                        | SMob delivery<br>Profession (n) | Experience | Recipient/s (n)       | Location/s | Technique/s<br>Grade/s | Interface/s              | Equipment                             | Metrological data |
|--------------------------------------------------|---------------------------------|------------|-----------------------|------------|------------------------|--------------------------|---------------------------------------|-------------------|
| <b>Non-humans</b>                                |                                 |            |                       |            |                        |                          |                                       |                   |
| Simmonds et al<br>1995, Canada <sup>27</sup>     | Clin<br>Physio (10)             | >5y        | Instrumented tool (1) | NA         | PA<br>I-V              | In tool                  | Pinch-grip analyser                   | No                |
| Petty & Messenger<br>1996, England <sup>24</sup> | Clin<br>Physio (1)              | NR         | Instrumented tool (1) | NA         | PA<br>NR               | Clin-tool<br>Clin-ground | Pinch-grip analyser<br>Force platform | No                |

278 Abbreviations: Clin: clinician, (n): number of participants, NA: not applicable, NR: not reported, PA: posterior-anterior, Physio: physiotherapist, SMob: spinal mobilization, y:  
279 years, >: greater than.

280

281

## **DISCUSSION**

282 This scoping review comprehensively synthesizes the existing evidence describing biomechanical  
283 parameters during the delivery of manually applied SMob, underscoring the substantial variability  
284 observed in these parameters. This finding is consistent with the results of two previous reviews  
285 reporting on SMob peak forces delivered in a PA direction (22,36), despite the current study having a  
286 larger scope of reporting (i.e. duration, frequency and force amplitude in addition to peak forces). The  
287 observed heterogeneity in the reported biomechanical parameters of SMob is likely attributable to  
288 several factors, such as differences in the: i) 'technique' used (e.g. PA vs oscillatory distractive  
289 techniques); ii) measurement equipment used (e.g. force plate vs. pressure pad); iii) location of  
290 biomechanical parameter measurement (e.g. clinician-patient vs. patient-table); iv)  
291 individuals/equipment to which SMob was applied (e.g. body mass index (BMI), equipment materials);  
292 and v) individuals who delivered SMob (e.g. experience). However, without detailed descriptions of  
293 each of these domains, it is not possible to know if the identified biomechanical parameter variability  
294 is related to methodological and/or reporting differences, inherent differences in SMob application or,  
295 some other factor (41). Additionally, with the continued increase in the reporting on SMob  
296 biomechanical parameter data, it is imperative that detailed descriptions are reported in manuscripts to  
297 allow readers the opportunity to assess for themselves possible reasons for differences in the data.

298

### **Detailed reporting of the intervention is necessary**

300 It is unknown if meaningful clinical differences between different types of SMob 'technique' (e.g. PA  
301 vs. oscillatory distraction) and/or grades of SMob exist (35). To assess this in future studies, there should  
302 be a detailed description of the applied SMob, including an explicit explanation of how the grade of  
303 SMob was defined. In the current review, detailed descriptions of SMob were not consistently provided.  
304 Specifically, there was large variation in the detail of SMob reporting and in many studies, replication  
305 of the intervention would be impossible based on the (lack of) details provided. Despite the existence  
306 of established reporting guidelines for health-related interventions (41), this lack of detail is not unique  
307 to SMob, existing also for interventions including SM (SM manuscript under peer-review) and dry

308 needling (48). It is recommended that a specific guideline for the standardized reporting of SMob,  
309 similar to that for the standardized reporting of SM (49), is developed to improve the reporting of SMob  
310 interventions. Indeed the (development and) use of such a guideline would go some way to improving  
311 the generally poor level of manual therapy trials reporting (50).

312

### 313 **Factors possibly responsible for reported heterogeneity of SMob biomechanical parameters**

314 It is not yet fully understood why forces measured at the clinician-patient and patient-table interfaces  
315 differ (42,43). However, as differences do exist, it is important for authors to report where and how  
316 biomechanical parameters were measured as results from studies measuring forces at different  
317 interfaces are not directly comparable. Furthermore, the terminology used should enable replication of  
318 study methodologies in future investigations and would be facilitated by the detailed reporting of  
319 biomechanical parameter definitions and calculations (e.g. was the peak force measured directly by the  
320 equipment or, was it mathematically estimated?). Without such details, it is impossible to compare  
321 biomechanical parameters between studies. Furthermore, it has been reported that demographics (e.g.  
322 sex, height and BMI) influence the application of manual therapy treatments (i.e. SMob and SM) (44–  
323 47). Specifically, these interventions are delivered more forcefully to males with a higher BMI. In  
324 summary, the interface of measurement, equipment used, terminology and SMob recipients should be  
325 systematically reported in detail to allow for both replication in future studies and reader judgement of  
326 the clinical relevance of reported results.

327

### 328 **Do biomechanical parameters matter clinically?**

329 It has been reported that biomechanical parameters of SMob (e.g. peak force and force amplitude) differ  
330 between students and experienced clinicians (45). Specifically, students apply less force, more slowly.  
331 Similar differences are also reported in the SM literature (51), further suggesting that the detailed  
332 reporting of the clinical experience of the individual delivering the intervention is necessary.  
333 Furthermore, Gorgos and colleagues reported on the reliability of inter-clinician and intra-clinician  
334 forces applied during joint mobilisation in a systematic review (52). The authors concluded that while



335 there is variability in the application of force between different clinicians, individual clinicians apply  
336 forces consistently. Despite such between-clinician differences in SMob force application, the literature  
337 shows that recipients experience beneficial clinical outcomes from various forms of manual therapy  
338 (including SMob) despite considerable differences in the biomechanical parameters of the applied  
339 interventions (e.g. low velocity, variable amplitude SMob vs. high velocity, low amplitude SM)  
340 (35,53,54). Additionally, some authors suggest that there is a threshold of 'dosage' (in terms of  
341 biomechanical parameters such as force and/or rate of force application), rather than an optimal  
342 intervention approach (i.e. SMob vs SM), required to elicit beneficial clinical outcomes (55,56).  
343 However, to our best knowledge, this subject has not been systematically investigated and no reference  
344 standards (i.e. ranges of biomechanical parameters) for SMob application have been published (52).  
345 Furthermore, the lack of detailed description of biomechanical parameters limits the generalizability of  
346 results reported by both individual studies, and their subsequent syntheses, to clinical practice as it  
347 remains unclear exactly what 'dosage' was applied (48). By exhaustively collating the existing literature,  
348 the current review provides a first step towards the development of such reference standards. However,  
349 the systematic biomechanical quantification of SMob is required to first establish if 'dosage' is related  
350 to physiological responses (e.g. changes in the autonomic and somatic nervous systems) and/or clinical  
351 outcomes (e.g. hypoalgesia).

### 352 **Strengths and limitations:**

353 This review is the first to synthesise SMob biomechanical parameter data beyond peak force (including  
354 also duration, frequency and force amplitude) and includes 21 additional studies since the publication  
355 of the most recent 2006 review (22). The review was conducted by an international and interprofessional  
356 team and reported according to the (PRISMA-ScR) statement (37). The study provides a first step  
357 towards the systematic and detailed reporting of SMob interventions, which is necessary to investigate  
358 the relationship between the application of SMob and its' observed clinical outcomes.

359

360 It is possible that there was unintentional exclusion of studies reporting on the parameters of interest.  
361 However, it is unlikely that seminal studies were excluded for several reasons: i) a comprehensive

362 search strategy was developed by an international, interprofessional team with relevant methodological  
363 and clinical expertise with the assistance of an experienced medical sciences librarian; ii) the search  
364 strategy was piloted and refined prior to being used; and iii) the review was conducted in a systematic  
365 fashion (i.e. using groups of two independent reviewers and data extractors). While it was intended that  
366 only original quantitative research data from studies utilizing SMob would be reported, it was not  
367 always clear as to whether reported data were previously published in part or fully. However, in  
368 instances where this was unclear, the decision was made to include the data. This decision ensured that  
369 the current review reported exhaustively on all studies reporting biomechanical parameters of SMob. It  
370 is recommended that secondary analyses of data are transparently reported as such (57,58), with citation  
371 of the original publication, allowing readers to identify that the data has been previously published and  
372 to interpret for themselves the impact of the re-reported data.

373

374

## **CONCLUSION**

375 This study has, as a first step, synthesised the current state of manually applied SMob biomechanical  
376 parameter reporting. Most studies reported on SMob delivered to human lumbar or cervical spines, with  
377 peak force the most commonly reported parameter. Other reported parameters included duration,  
378 frequency and force amplitude. These findings highlight that considerable variability exists in the  
379 literature regarding SMob biomechanical parameters. Future studies should focus on the detailed  
380 reporting of biomechanical parameters which may facilitate the systematic investigation of dose-  
381 response effects clinically and the future development of reference standards (e.g. ranges of forces) for  
382 optimal intervention delivery.

383

384

## **ACKNOWLEDGEMENTS**

385

386 The authors would like to acknowledge Dr. XX (The University of XX) for her assistance with the  
387 literature search.

388

389

## REFERENCES

- 390 1. Hoy DG, Protani M, De R, Buchbinder R. The epidemiology of neck pain. *Best Pract Res Clin*  
391 *Rheumatol.* 2010 Dec;24(6):783–92.
- 392 2. Hoy D, Bain C, Williams G, March L, Brooks P, Blyth F, et al. A systematic review of the global  
393 prevalence of low back pain. *Arthritis Rheum.* 2012 Jun;64(6):2028–37.
- 394 3. Meucci RD, Fassa AG, Faria NMX. Prevalence of chronic low back pain: systematic review. *Rev*  
395 *Saúde Pública.* 2015;49.
- 396 4. Kazeminasab S, Nejadghaderi SA, Amiri P, Pourfathi H, Araj-Khodaei M, Sullman MJM, et al.  
397 Neck pain: global epidemiology, trends and risk factors. *BMC Musculoskelet Disord.* 2022 Jan  
398 3;23(1):26.
- 399 5. Safiri S, Kolahi AA, Cross M, Hill C, Smith E, Carson-Chahhoud K, et al. Prevalence, Deaths, and  
400 Disability-Adjusted Life Years Due to Musculoskeletal Disorders for 195 Countries and Territories  
401 1990–2017. *Arthritis Rheumatol.* 2021 Apr 1;73(4):702–14.
- 402 6. Froud R, Patterson S, Eldridge S, Seale C, Pincus T, Rajendran D, et al. A systematic review and  
403 meta-synthesis of the impact of low back pain on people’s lives. *BMC Musculoskelet Disord.* 2014  
404 Feb 21;15(1):50.
- 405 7. Safiri S, Kolahi AA, Hoy D, Buchbinder R, Mansournia MA, Bettampadi D, et al. Global, regional,  
406 and national burden of neck pain in the general population, 1990-2017: systematic analysis of the  
407 Global Burden of Disease Study 2017. *BMJ.* 2020 Mar 26;368:m791.
- 408 8. Vos T, Lim SS, Abbafati C, Abbas KM, Abbasi M, Abbasifard M, et al. Global burden of 369  
409 diseases and injuries in 204 countries and territories, 1990–2019: a systematic analysis for the  
410 Global Burden of Disease Study 2019. *The Lancet.* 2020 Oct 17;396(10258):1204–22.

- 411 9. Dieleman JL, Cao J, Chapin A, Chen C, Li Z, Liu A, et al. US Health Care Spending by Payer and  
412 Health Condition, 1996-2016. *JAMA*. 2020 Mar 3;323(9):863–84.
- 413 10. Chen N, Fong DYT, Wong JYH. Health and Economic Outcomes Associated With  
414 Musculoskeletal Disorders Attributable to High Body Mass Index in 192 Countries and Territories  
415 in 2019. *JAMA Netw Open*. 2023 Jan 20;6(1):e2250674–e2250674.
- 416 11. Power JD, Perruccio AV, Paterson JM, Canizares M, Veillette C, Coyte PC, et al. Healthcare  
417 Utilization and Costs for Musculoskeletal Disorders in Ontario, Canada. *J Rheumatol*. 2022  
418 Jul;49(7):740–7.
- 419 12. Corp N, Mansell G, Stynes S, Wynne-Jones G, Morsø L, Hill JC, et al. Evidence-based treatment  
420 recommendations for neck and low back pain across Europe: A systematic review of guidelines.  
421 *Eur J Pain*. 2021 Feb 1;25(2):275–95.
- 422 13. Risetti M, Gambugini R, Testa M, Battista S. Management of non-specific thoracic spine pain: a  
423 cross-sectional study among physiotherapists. *BMC Musculoskelet Disord*. 2023 May  
424 19;24(1):398.
- 425 14. Beliveau PJH, Wong JJ, Sutton DA, Simon NB, Bussièrès AE, Mior SA, et al. The chiropractic  
426 profession: a scoping review of utilization rates, reasons for seeking care, patient profiles, and care  
427 provided. *Chiropr Man Ther*. 2017 Nov 22;25(35).
- 428 15. Babatunde OO, Jordan JL, Van der Windt DA, Hill JC, Foster NE, Protheroe J. Effective treatment  
429 options for musculoskeletal pain in primary care: A systematic overview of current evidence. *PloS*  
430 *One*. 2017;12(6):e0178621.
- 431 16. Lin I, Wiles L, Waller R, Goucke R, Nagree Y, Gibberd M, et al. What does best practice care for  
432 musculoskeletal pain look like? Eleven consistent recommendations from high-quality clinical  
433 practice guidelines: systematic review. *Br J Sports Med*. 2020 Jan 1;54(2):79.

- 434 17. Foster NE, Hartvigsen J, Croft PR. Taking responsibility for the early assessment and treatment of  
435 patients with musculoskeletal pain: a review and critical analysis. *Arthritis Res Ther*. 2012 Feb  
436 29;14(1):205.
- 437 18. George SZ, Fritz JM, Silfies SP, Schneider MJ, Beneciuk JM, Lentz TA, et al. Interventions for the  
438 Management of Acute and Chronic Low Back Pain: Revision 2021. *J Orthop Sports Phys Ther*.  
439 2021 Nov 1;51(11):CPG1–60.
- 440 19. Blanpied PR, Gross AR, Elliott JM, Devaney LL, Clewley D, Walton DM, et al. Neck Pain:  
441 Revision 2017. *J Orthop Sports Phys Ther*. 2017 Jul 1;47(7):A1–83.
- 442 20. Bussieres AE, Stewart G, Al-Zoubi F, Decina P, Descarreaux M, Haskett D, et al. Spinal  
443 Manipulative Therapy and Other Conservative Treatments for Low Back Pain: A Guideline From  
444 the Canadian Chiropractic Guideline Initiative. *J Manip Physiol Ther*. 2018 Mar 29;
- 445 21. Bussieres AE, Stewart G, Al-Zoubi F, Decina P, Descarreaux M, Hayden J, et al. The treatment of  
446 neck pain-associated disorders and whiplash-associated disorders: a clinical practice guideline. *J*  
447 *Manipulative Physiol Ther*. 2016 Oct;39(8):523–64.
- 448 22. Snodgrass SJ, Rivett DA, Robertson VJ. Manual Forces Applied During Posterior-to-Anterior  
449 Spinal Mobilization: A Review of the Evidence. *J Manipulative Physiol Ther*. 2006  
450 May;29(4):316–29.
- 451 23. Maitland, GD. *Vertebral manipulation*. 5th ed. London: Butterworth; 1986.
- 452 24. Maitland, GD. *Maitland's vertebral manipulation*. 6th ed. Oxford, England: Butterworth-  
453 Heinemann; 2001.
- 454 25. Hegedus EJ, Goode A, Butler RJ, Slaven E. The neurophysiological effects of a single session of  
455 spinal joint mobilization: does the effect last? *J Man Manip Ther*. 2011 Aug;19(3):143–51.

- 456 26. Sterling M, Jull G, Wright A. Cervical mobilisation: concurrent effects on pain, sympathetic  
457 nervous system activity and motor activity. *Man Ther.* 2001 May;6(2):72–81.
- 458 27. Ali MN, Sethi K, Noohu MM. Comparison of two mobilization techniques in management of  
459 chronic non-specific low back pain. *J Bodyw Mov Ther.* 2019 Oct;23(4):918–23.
- 460 28. Schmid A, Brunner F, Wright A, Bachmann LM. Paradigm shift in manual therapy? Evidence for  
461 a central nervous system component in the response to passive cervical joint mobilisation. *Man*  
462 *Ther.* 2008 Oct;13(5):387–96.
- 463 29. Bialosky JE, Bishop MD, Price DD, Robinson ME, George SZ. The mechanisms of manual therapy  
464 in the treatment of musculoskeletal pain: a comprehensive model. *Man Ther.* 2009;14(5):531–8.
- 465 30. Alonso-Perez JL, Lopez-Lopez A, La Touche R, Lerma-Lara S, Suarez E, Rojas J, et al.  
466 Hypoalgesic effects of three different manual therapy techniques on cervical spine and  
467 psychological interaction: A randomized clinical trial. *J Bodyw Mov Ther.* 2017;21(4):798–803.
- 468 31. Hidalgo B, Pitance L, Hall T, Detrembleur C, Nielens H. Short-term effects of Mulligan  
469 mobilization with movement on pain, disability, and kinematic spinal movements in patients with  
470 nonspecific low back pain: a randomized placebo-controlled trial. *J Manipulative Physiol Ther.*  
471 2015 Aug;38(6):365–74.
- 472 32. Pasquier M, Daneau C, Marchand AA, Lardon A, Descarreaux M. Spinal manipulation frequency  
473 and dosage effects on clinical and physiological outcomes: a scoping review. *Chiropr Man Ther.*  
474 2019 May 22;27(1):23.
- 475 33. Matesanz-García L, Schmid AB, Cáceres-Pajuelo JE, Cuenca-Martínez F, Arribas-Romano A,  
476 González-Zamorano Y, et al. Effect of Physiotherapeutic Interventions on Biomarkers of  
477 Neuropathic Pain: A Systematic Review of Preclinical Literature. *J Pain.* 2022 Nov;23(11):1833–  
478 55.

- 479 34. Lascurain-Aguirrebeña I, Newham D, Critchley DJ. Mechanism of Action of Spinal Mobilizations:  
480 A Systematic Review. *Spine*. 2016 Jan;41(2):159–72.
- 481 35. Aoyagi K, Heller D, Hazlewood D, Sharma N, dos Santos M. Is spinal mobilization effective for  
482 low back pain?: A systematic review. *Complement Ther Clin Pract*. 2019;34:51–63.
- 483 36. Bjornsdottir SV, Kumar S. Posteroanterior spinal mobilization: state of the art review and  
484 discussion. *Disabil Rehabil*. 1997 Feb;19(2):39–46.
- 485 37. Tricco AC, Lillie E, Zarin W, O’Brien KK, Colquhoun H, Levac D, et al. PRISMA Extension for  
486 Scoping Reviews (PRISMA-ScR): Checklist and Explanation. *Ann Intern Med*. 2018 Oct  
487 2;169(7):467–73.
- 488 38. Cooke A, Smith D, Booth A. Beyond PICO: the SPIDER tool for qualitative evidence synthesis.  
489 *Qual Health Res*. 2012 Oct;22(10):1435–43.
- 490 39. Ouzzani M, Hammady H, Fedorowicz Z, Elmagarmid A. Rayyan-a web and mobile app for  
491 systematic reviews. *Syst Rev*. 2016 Dec 5;5(1):210.
- 492 40. Mercier MA, Rousseau P, Funabashi M, Descarreaux M, Pagé I. Devices Used to Measure Force-  
493 Time Characteristics of Spinal Manipulations and Mobilizations: A Mixed-Methods Scoping  
494 Review on Metrologic Properties and Factors Influencing Use. *Front Pain Res [Internet]*. 2021;2.  
495 Available from: <https://www.frontiersin.org/articles/10.3389/fpain.2021.755877>
- 496 41. Hoffmann TC, Glasziou PP, Boutron I, Milne R, Perera R, Moher D, et al. Better reporting of  
497 interventions: template for intervention description and replication (TIDieR) checklist and guide.  
498 *BMJ*. 2014 Mar 7;348:g1687.
- 499 42. Mikhail J, Funabashi M, Descarreaux M, Page I. Assessing forces during spinal manipulation and  
500 mobilization: factors influencing the difference between forces at the patient-table and clinician-  
501 patient interfaces. *Chiropr Man Ther*. 11 10;28(1):57.

- 502 43. Kirstukas SJ, Backman JA. Physician-applied contact pressure and table force response during  
503 unilateral thoracic manipulation. *J Manipulative Physiol Ther.* 1999 Jun;22(5):269–79.
- 504 44. Passmore SR, Malone Q, MacNeil B, Sanli E, Gonzalez D. Differing Characteristics of Human-  
505 Shaped Visual Stimuli Affect Clinicians’ Dosage of a Spinal Manipulative Thrust on a Low-  
506 Fidelity Model: A Cross-Sectional Study. *J Manipulative Physiol Ther.* 2022 Mar;45(3):171–8.
- 507 45. Snodgrass SJ, Rivett DA, Robertson VJ, Stojanovski E. A comparison of cervical spine  
508 mobilization forces applied by experienced and novice physiotherapists. *J Orthop Sports Phys Ther.*  
509 2010 Jul;40(7):392–401.
- 510 46. Harms MC, Innes SM, Bader DL. Forces measured during spinal manipulative procedures in two  
511 age groups. *Rheumatology.* 1999 Mar;38(3):267–74.
- 512 47. Chiradejnant A, Latimer J, Maher CG. Forces applied during manual therapy to patients with low  
513 back pain. *J Manipulative Physiol Ther.* 2002 Jul;25(6):362–9.
- 514 48. Kearns GA, Brismée JM, Riley SP, Wang-Price S, Denninger T, Vugrin M. Lack of standardization  
515 in dry needling dosage and adverse event documentation limits outcome and safety reports: a  
516 scoping review of randomized clinical trials. *J Man Manip Ther.* 2023 Apr;31(2):72–83.
- 517 49. Groeneweg R, Rubinstein SM, Oostendorp RAB, Ostelo RWJG, van Tulder MW. Guideline for  
518 Reporting Interventions on Spinal Manipulative Therapy: Consensus on Interventions Reporting  
519 Criteria List for Spinal Manipulative Therapy (CIRCLE SMT). *J Manipulative Physiol Ther.*  
520 2017;40(2):61–70.
- 521 50. Alvarez G, Sola I, Sitja-Rabert M, Fort-Vanmeerhaeghe A, Gich I, Fernandez C, et al. A  
522 methodological review revealed that reporting of trials in manual therapy has not improved over  
523 time. *J Clin Epidemiol.* 5;121:32–44.
- 524 51. Descarreaux M, Dugas C, Raymond J, Normand MC. Kinetic analysis of expertise in spinal  
525 manipulative therapy using an instrumented manikin. *J Chiropr Med.* 2005 Mar 1;4(2):53–60.



- 526 52. Gorgos KS, Wasylyk NT, Van Lunen BL, Hoch MC. Inter-clinician and intra-clinician reliability  
527 of force application during joint mobilization: a systematic review. *Man Ther.* 2014 Apr;19(2):90–  
528 6.
- 529 53. Coulter ID, Crawford C, Vernon H, Hurwitz EL, Khorsan R, Booth MS, et al. Manipulation and  
530 Mobilization for Treating Chronic Nonspecific Neck Pain: A Systematic Review and Meta-  
531 Analysis for an Appropriateness Panel. *Pain Physician.* 2019 Mar;22(2):E55–70.
- 532 54. Coulter ID, Crawford C, Hurwitz EL, Vernon H, Khorsan R, Suttrop Booth M, et al. Manipulation  
533 and mobilization for treating chronic low back pain: a systematic review and meta-analysis. *Spine*  
534 *J Off J North Am Spine Soc.* 5;18(5):866–79.
- 535 55. Snodgrass SJ, Rivett DA, Sterling M, Vicenzino B. Dose optimization for spinal treatment  
536 effectiveness: a randomized controlled trial investigating the effects of high and low mobilization  
537 forces in patients with neck pain. *J Orthop Sports Phys Ther.* 2014 Mar;44(3):141–52.
- 538 56. Gorrell LM, Beath K, Engel RM. Manual and instrument applied cervical manipulation for  
539 mechanical neck pain: a randomized controlled trial. *J Manipulative Physiol Ther.* 2016;39(5):319–  
540 29.
- 541 57. Swart E, Schmitt J. STandardized Reporting Of Secondary data Analyses (STROSA) - Vorschlag  
542 für ein Berichtsformat für Sekundärdatenanalysen. *Qualitätsmessung.* 2014 Jan 1;108(8):511–6.
- 543 58. Schulz KF, Altman DG, Moher D, the CONSORT Group. CONSORT 2010 Statement: updated  
544 guidelines for reporting parallel group randomised trials. *BMC Med.* 2010 Mar 24;8(1):18.

545

## Identification of studies via databases and registers

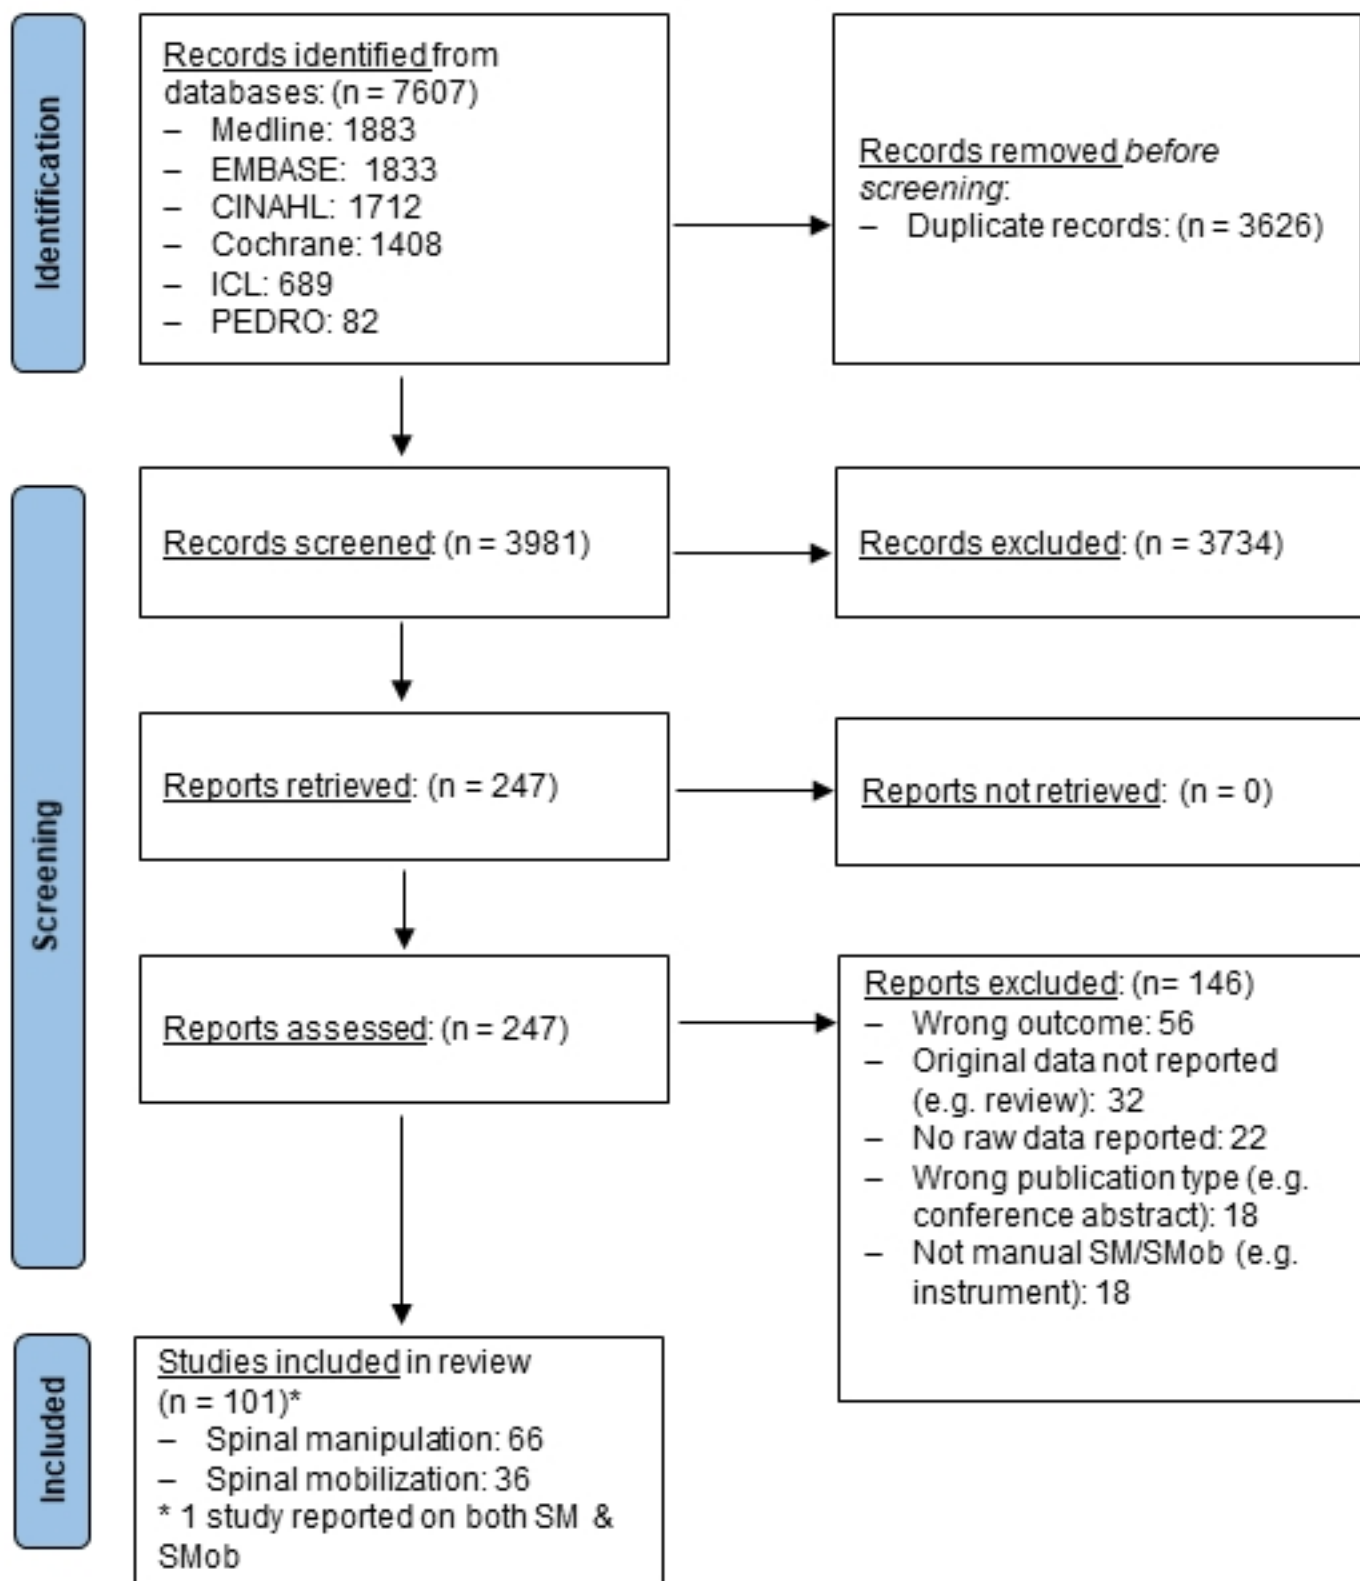

Figure
